# Supplementary material
Source: Springer Nature journal article supplement (https://www.springermedizin.de/resource/supplementary/13058_2010_9463_MOESM5_ESM.pdf/9702214)

# Family 110

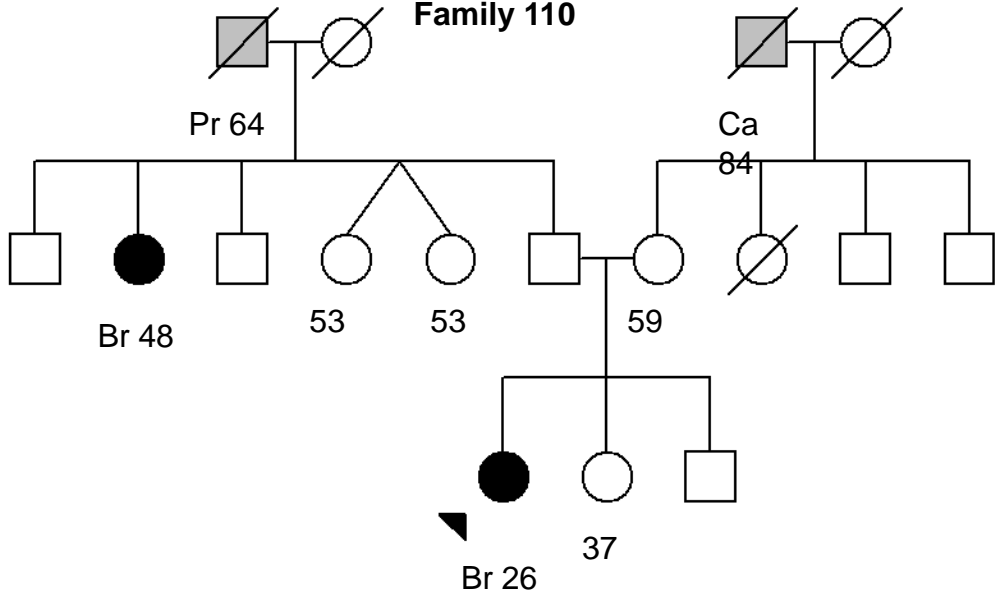

***CHEK2*, c.470T>C**

***CHEK2*, c.792+39C>T**

***CHEK2*, c.1100delC**

***RAD50*, c.2398-32A>G**

Supplement: MOESM5 [file 9702214]
